# Supplementary material for: Biocompatible strategies for peptide macrocyclisation
Source: Royal Society of Chemistry journal article supplement (doi:10.1039/d3sc05738k), 2024-01-01
Supplement: d3sc05738k1.pdf [file d3sc05738k1.pdf]

**Table S1.** Peptides and peptidomimetics approved by the FDA between 2017 and 2023.

| Year approved                                                                  | Total drugs | Total peptides | Peptides/ peptidomimetics            |            |
|--------------------------------------------------------------------------------|-------------|----------------|--------------------------------------|------------|
| 2017                                                                           | 46          | 6              | Etelcalcetide                        | Linear     |
|                                                                                |             |                | Semaglutide                          | Linear     |
|                                                                                |             |                | Abaloparatide                        | Linear     |
|                                                                                |             |                | Macimorelin                          | Linear     |
|                                                                                |             |                | Plecanatide                          | Cyclic     |
|                                                                                |             |                | Angiotensin II                       | Linear     |
| 2018                                                                           | 59          | 1              | Lutetium <sup>177</sup> Lu-DOTA-TATE | Cyclic     |
| 2019                                                                           | 48          | 3              | Bremelanotide                        | Cyclic     |
|                                                                                |             |                | Afamelanotide                        | Linear     |
|                                                                                |             |                | Edotreotide gallium <sup>68</sup> Ga | Cyclic     |
| 2020                                                                           | 53          | 3              | Setmelanotide                        | Cyclic     |
|                                                                                |             |                | Cu-DOTATE                            | Cyclic     |
|                                                                                |             |                | <sup>68</sup> Ga PSMA-1              | Linear     |
| 2021                                                                           | 51          | 8              | Vosoritide                           | Cyclic     |
|                                                                                |             |                | Odevixibat                           | Linear     |
|                                                                                |             |                | Melphalan flufenamide                | Linear     |
|                                                                                |             |                | Dasiglucagon                         | Linear     |
|                                                                                |             |                | Difelikefalin                        | Linear     |
|                                                                                |             |                | Piflufolastat- <sup>18</sup> F       | Linear     |
|                                                                                |             |                | Pegcetacoplan                        | Cyclic     |
|                                                                                |             |                | Voclosporin                          | Cyclic     |
| 2022                                                                           | 37          | 3              | Lutetium vipivotide tetraxetan       | Linear     |
|                                                                                |             |                | Tirzepatide                          | Linear     |
|                                                                                |             |                | Terlipressin                         | Cyclic     |
| 2023                                                                           | 55          | 6              | Zilucoplan                           | Cyclic     |
|                                                                                |             |                | Motixafortide                        | Cyclic     |
|                                                                                |             |                | Flotufolastat <sup>18</sup> F        | Linear     |
|                                                                                |             |                | Nirmatrelvir, ritonavir              | Linear     |
|                                                                                |             |                | Rezafungin                           | Cyclic     |
|                                                                                |             |                | Trofnetide                           | Linear     |
| Total drugs approved by the FDA (2017-2023)                                    |             |                |                                      | <b>349</b> |
| Total peptides and peptidomimetics approved by the FDA (2017-2023)             |             |                |                                      | <b>30</b>  |
| <b>Percentage of peptides/ peptidomimetics approved by the FDA (2017-2023)</b> |             |                |                                      | <b>9%</b>  |
